# Supplementary material for: Podocyte Detachment and Reduced Glomerular Capillary Endothelial Fenestration in Human Type 1 Diabetic Nephropathy
Source: Oxford University Press journal article supplement (doi:10.2337/db07-0019), 2007-07-27
Supplement: db070019onlineappendix.doc [file db070019onlineappendix.doc]

**Appendix Figure 4**

**Classical glomerular structural parameters of diabetic nephropathy.** Values for glomerular basement membrane (GBM) width and mesangial [VV(Mes/glom)]; mesangial matrix [VV(MM/glom)] and mesangial cell [VV(MC/glom)] fractional volumes in controls (C), normoalbuminuric (NA), microalbuminuric (MA) and proteinuric (P) type 1 diabetic patients. □=mean; SE=standard error; SD=standard deviation; ○=statistical outlier. Only p-values <0.05 are shown.

**Appendix Figure 5**

**Structural parameters of podocytes and endothelial fenestration.** Values for foot process width; surface density of intact podocyte foot processes on peripheral glomerular basement membrane [Ss(IFP/PGBM)]; surface density of intact podocyte foot processes on mesangial glomerular basement membrane [Ss(IFP/MGBM)] and surface density of endothelial fenestration per glomerular capillary lumen [Ss(Fenestrated/cap)] in controls (C), normoalbuminuric (NA), microalbuminuric (MA) and proteinuric (P) type 1 diabetic patients. □=mean; SE=standard error; SD=standard deviation; ○=statistical outlier. Only p-values <0.05 are shown.
